# Supplementary material for: Inter-individual differences in the gene content of human gut bacterial species
Source: PubMed Central journal article supplement (PMC4428241; doi:10.1186/s13059-015-0646-9), 2015-04-21

Pairwise differences (%)

30  
20  
10  
0

Reference genomes

Bacteroidetes + Firmicutes  
reference genomes

Bacteroidetes + Firmicutes  
gut metagenomes

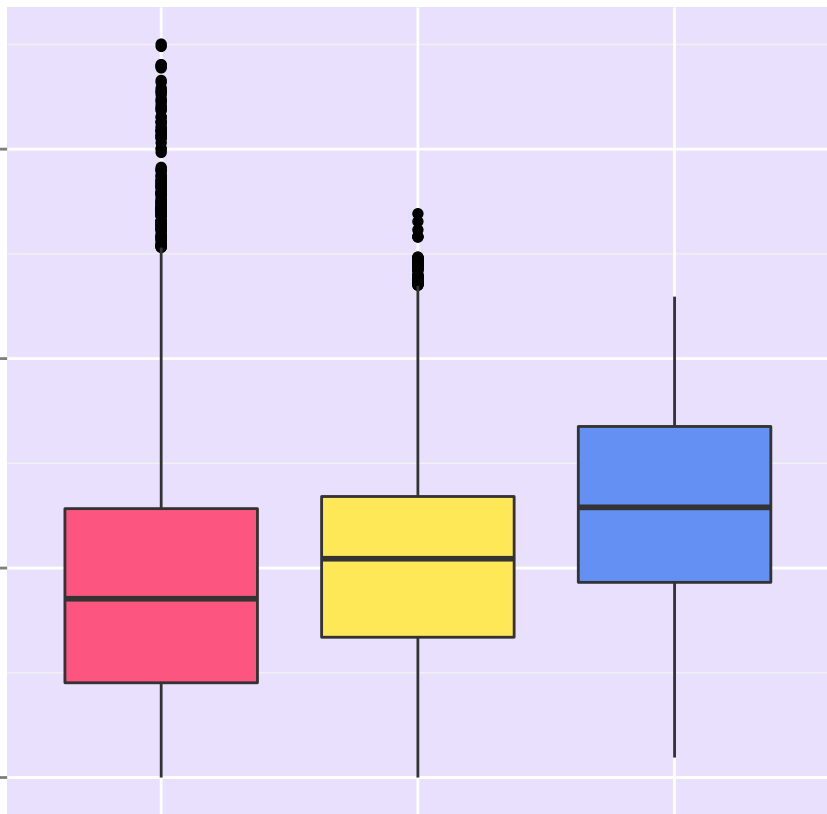

Supplement: 13059_2015_646_MOESM3_ESM.pdf [file 13059_2015_646_MOESM3_ESM.pdf]
