# Supplementary material for: Inter-individual differences in the gene content of human gut bacterial species
Source: PubMed Central journal article supplement (PMC4428241; doi:10.1186/s13059-015-0646-9), 2015-04-21

# Parabacteroides sp. D13

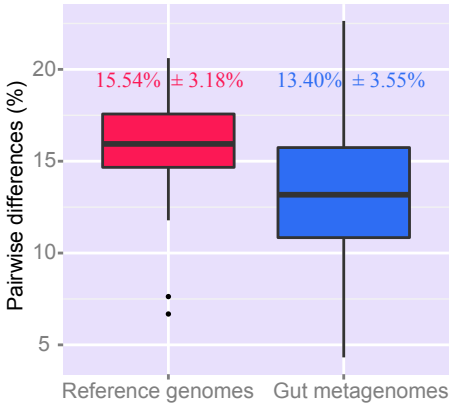

Supplement: 13059_2015_646_MOESM4_ESM.pdf [file 13059_2015_646_MOESM4_ESM.pdf]
