# Supplementary material for: Inter-individual differences in the gene content of human gut bacterial species
Source: PubMed Central journal article supplement (PMC4428241; doi:10.1186/s13059-015-0646-9), 2015-04-21

*Ruminococcus bromii*

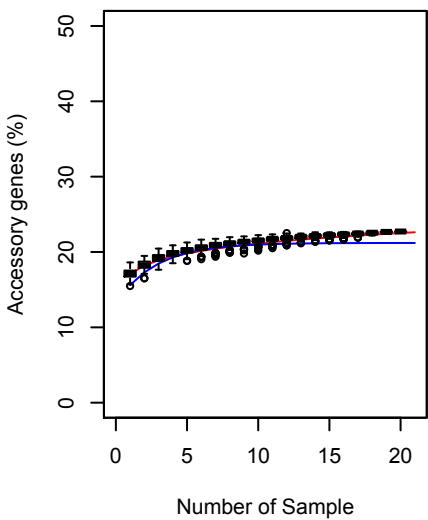

*Alistipes putredinis*

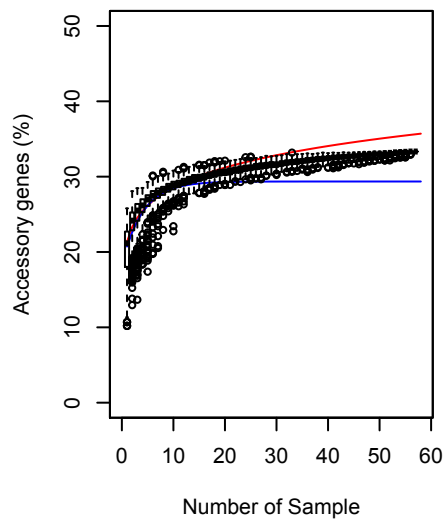

*Parabacteroides sp. D13*

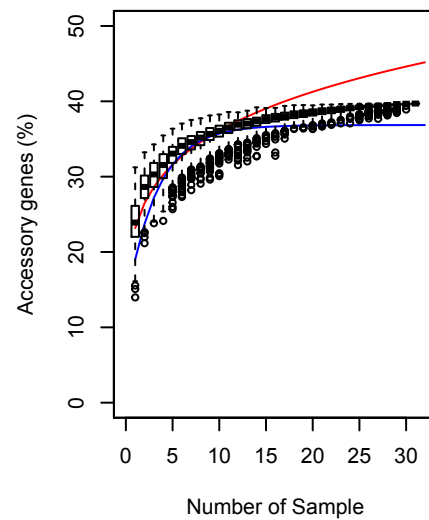

*Bacteroides cellulosilyticus*

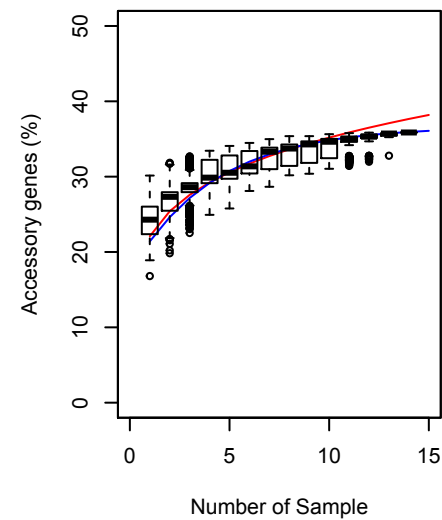

*Alistipes shahii*

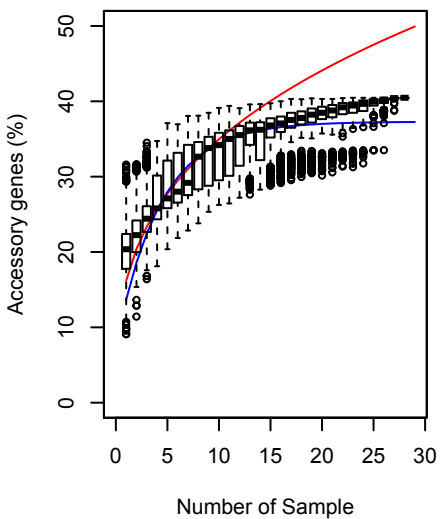

*Dialister invisus*

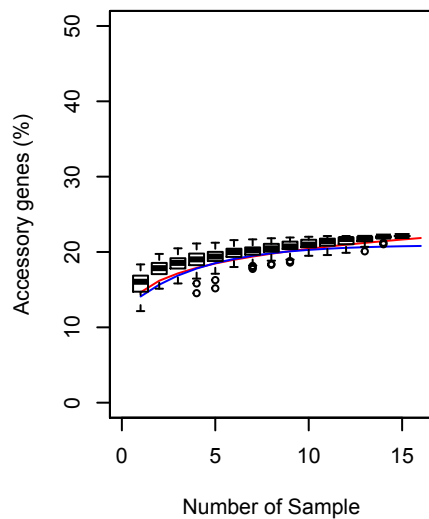

*Butyrivibrio crossotus*

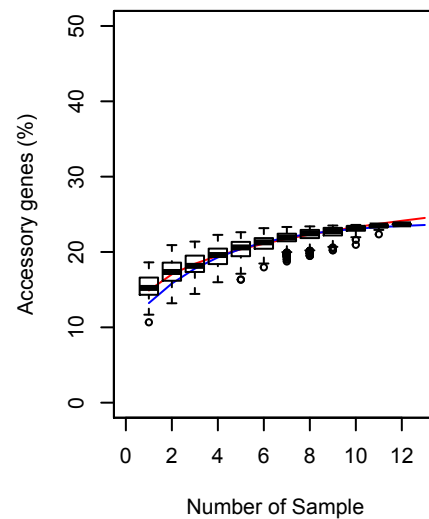

*Bacteroides eggerthii*

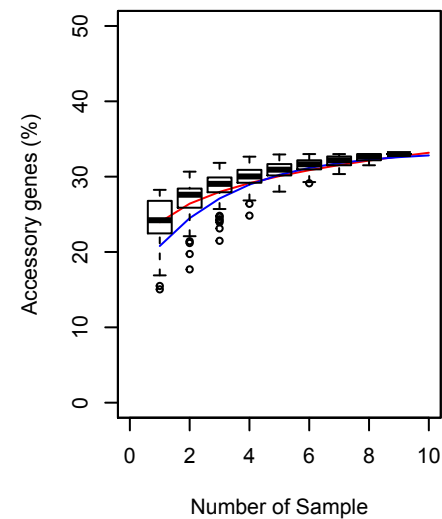

*Bacteroides sp. 1\_1\_6*

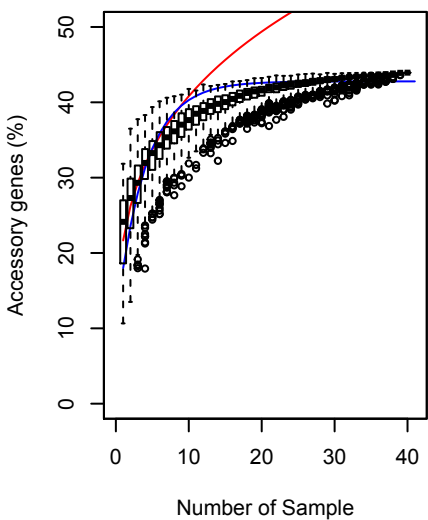

*Faecalibacterium prausnitzii*

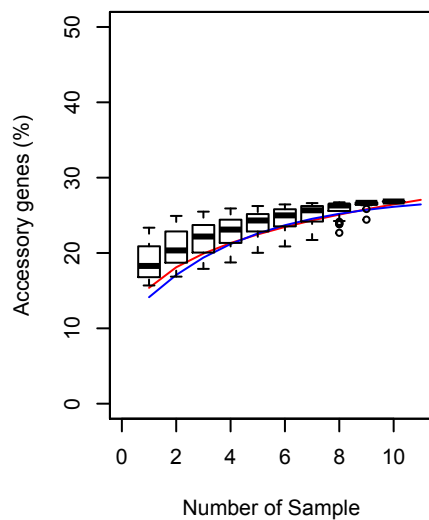

*Prevotella copri*

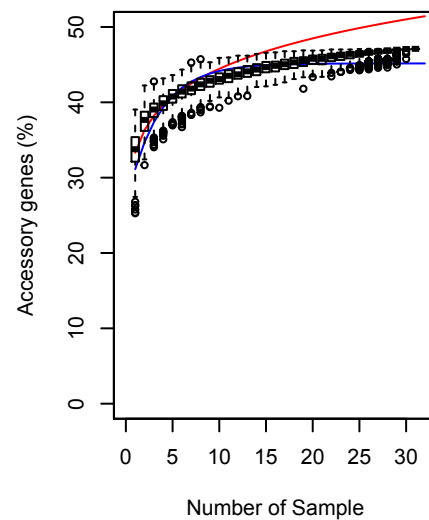

Supplement: 13059_2015_646_MOESM13_ESM.pdf [file 13059_2015_646_MOESM13_ESM.pdf]
